# Supplementary material
Source: MDPI journal article supplement (https://www.mdpi.com/2673-8112/1/1/11)
Supplement: s1 [file s1 › covid-1284138-supplementary.pdf]

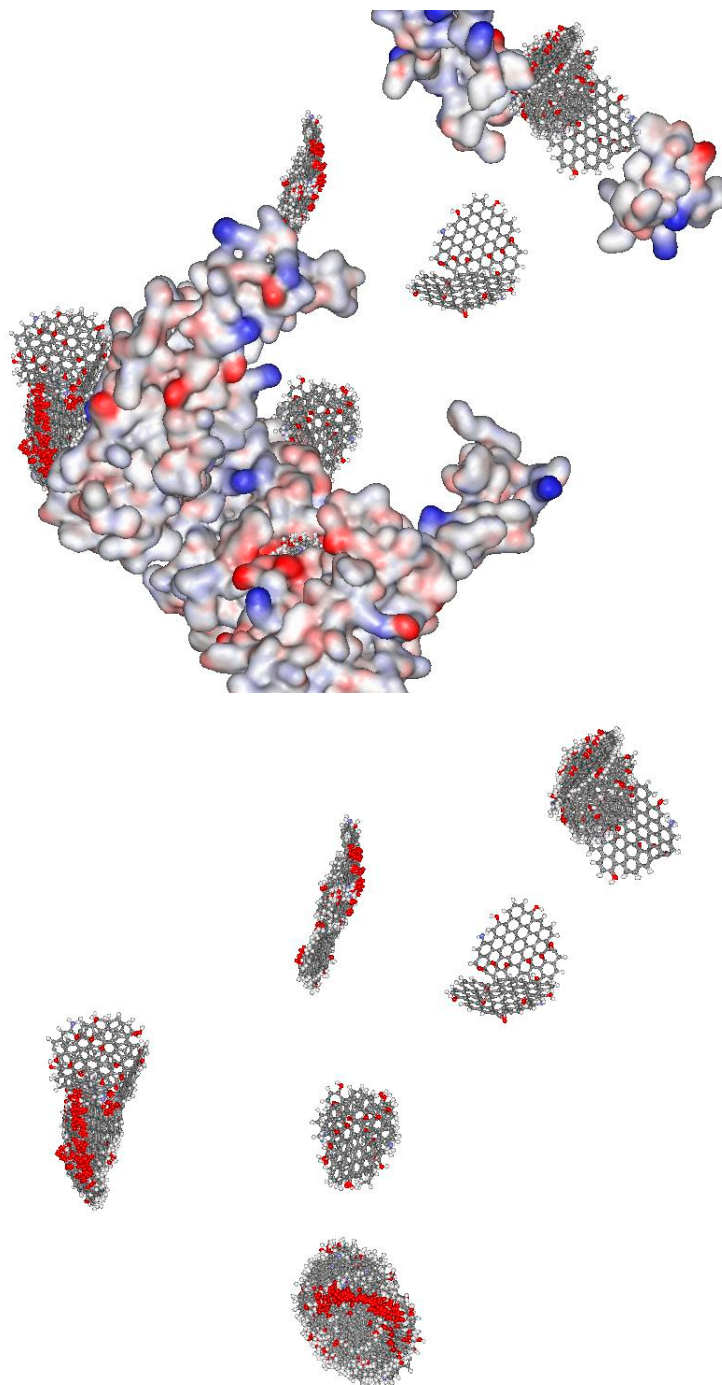

**Fig. S1** Distribution of  $\text{NH}_2\text{-OH-CQD}$  in SARS-CoV-2 S-protein obtained by molecular docking. interaction with three branches of COVID-19 S protein (Up) and distributed CQDs (down)

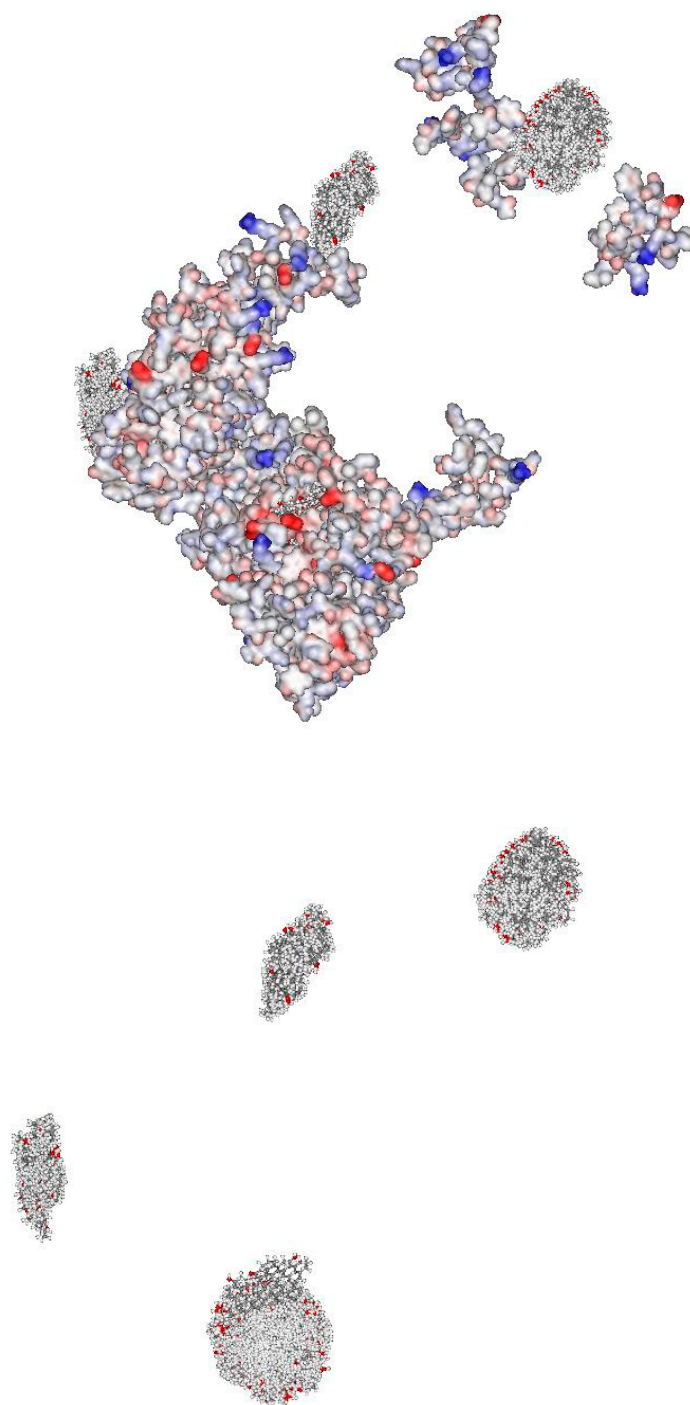

**Fig. S2** Distribution of OH-CQD in SARS-CoV-2 S-protein obtained by molecular docking. interaction with three branches of COVID-19 S protein (Up) and distributed CQDs (down)

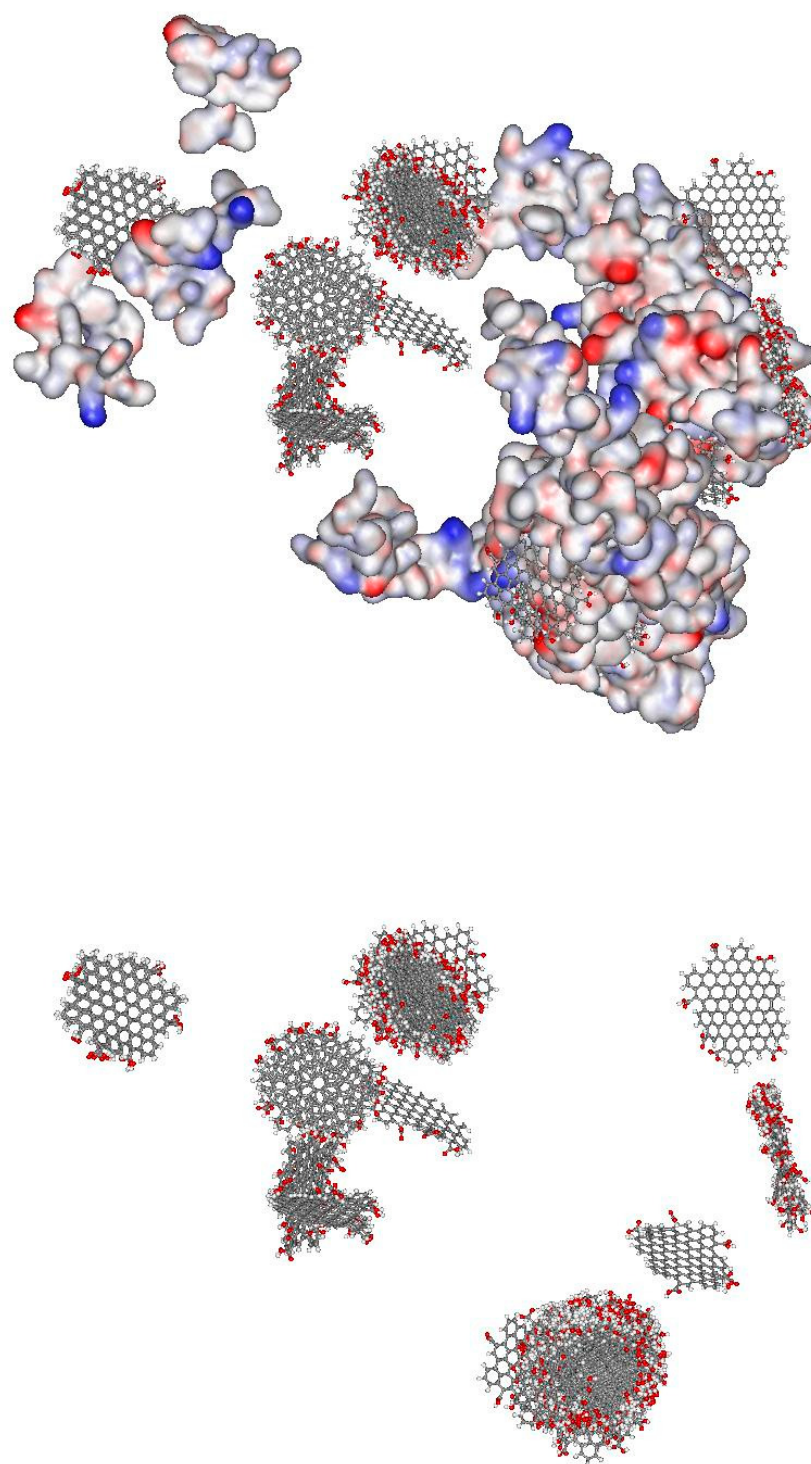

**Fig. S3** Distribution of COOH-CQD in SARS-CoV-2 S-protein obtained by molecular docking. interaction with three branches of COVID-19 S protein (Up) and distributed CQDs (down)

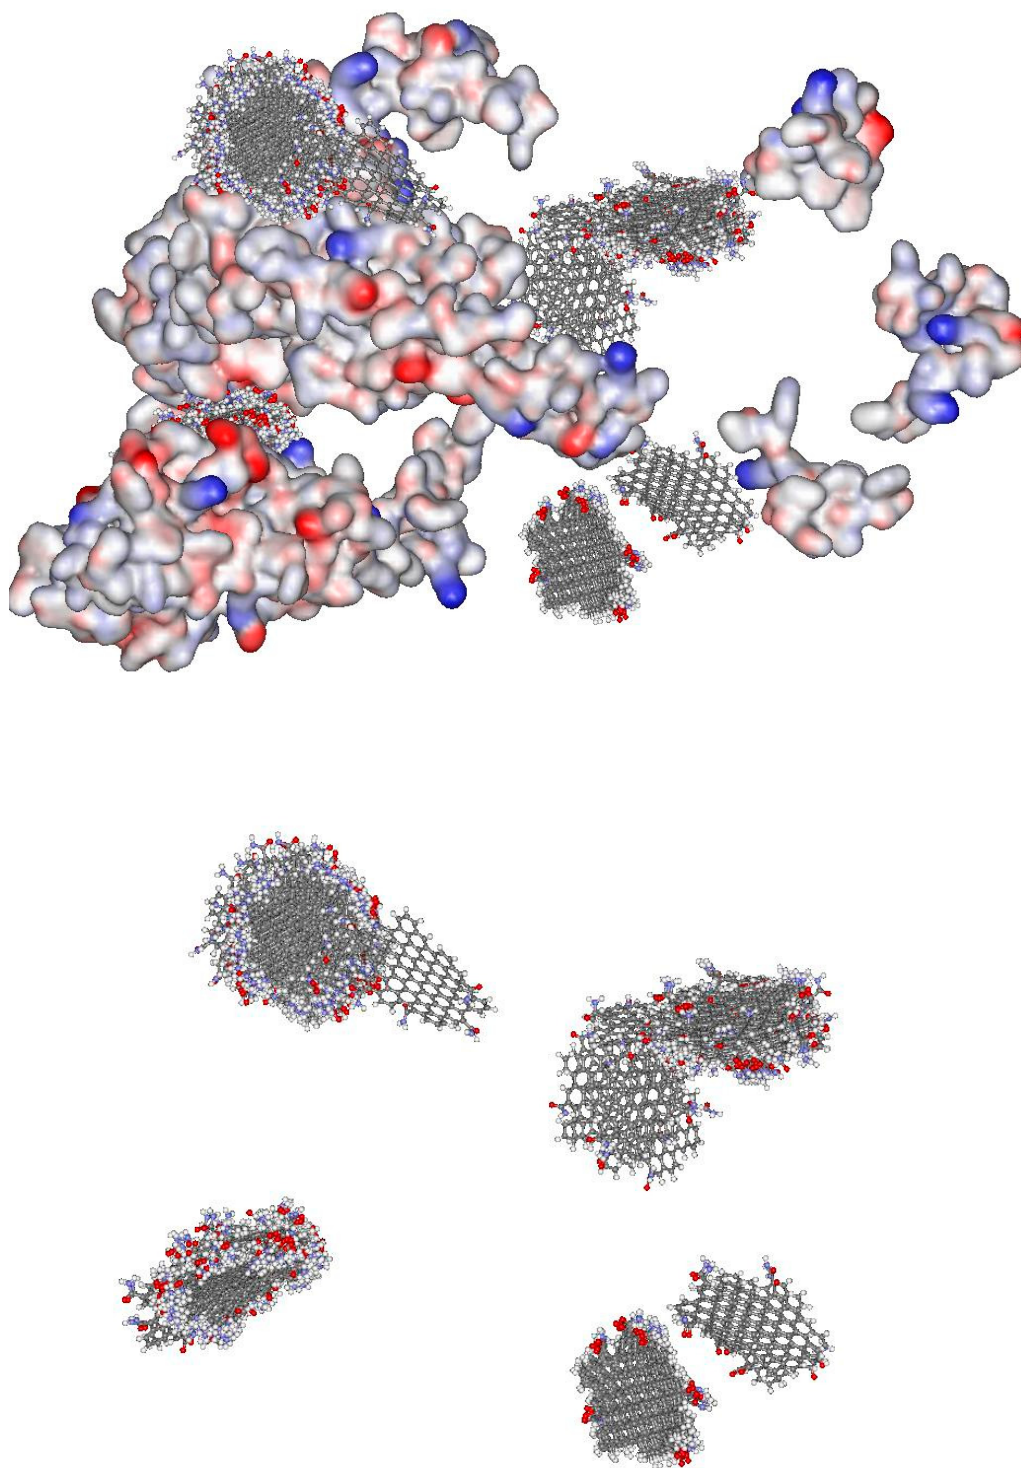

**Fig. S4** Distribution of Amide-CQD in SARS-CoV-2 S-protein obtained by molecular docking. interaction with three branches of COVID-19 S protein (Up) and distributed CQDs (down)

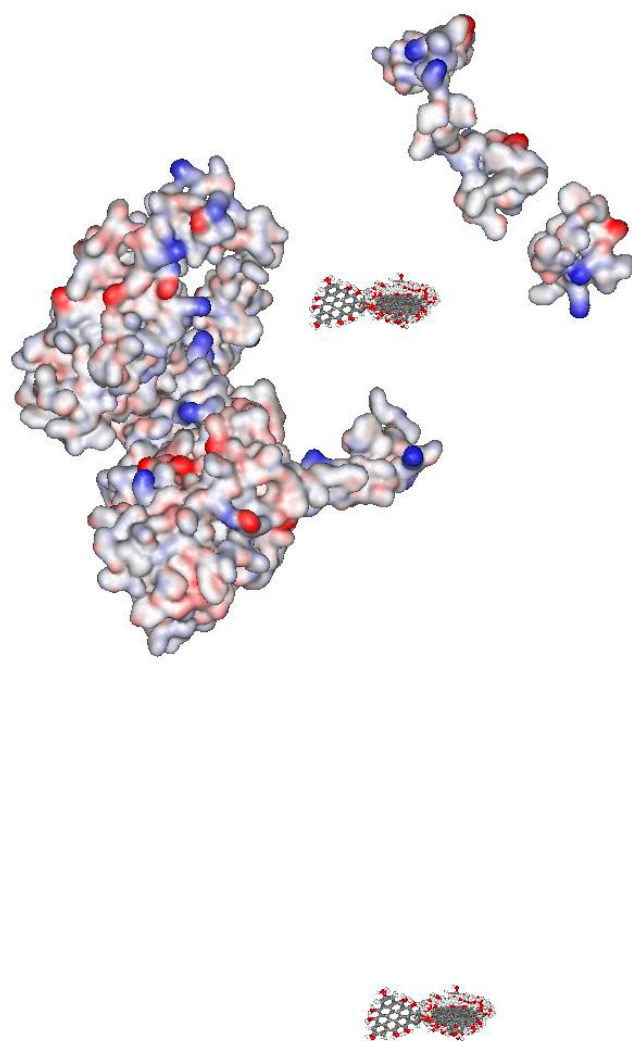

**Fig. S5** Distribution of Carbon nano-flake THG1 in SARS-CoV-2 S-protein obtained by molecular docking. interaction with three branches of COVID-19 S protein (Up) and distributed CQDs (down).

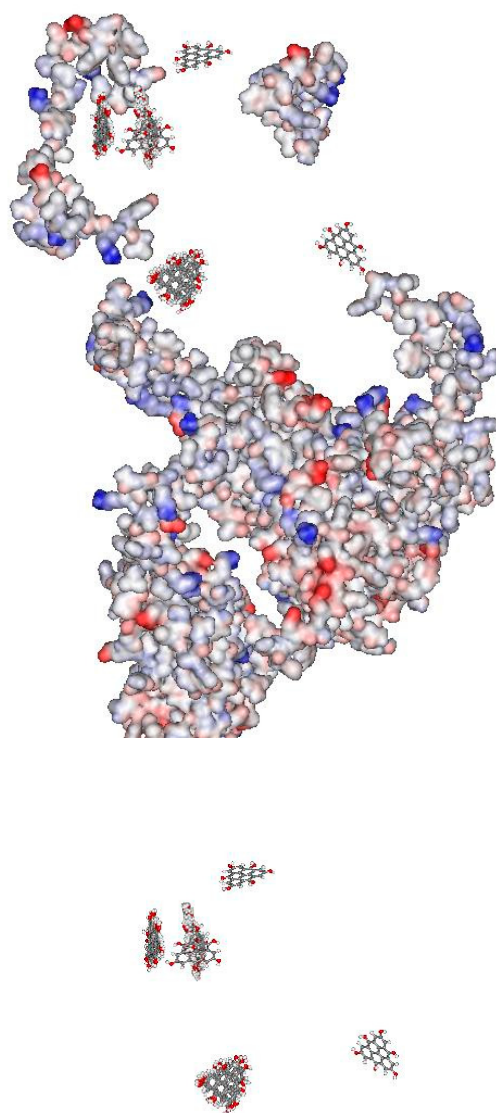

**Fig. S6** Distribution of Carbon nano-flake THG2 in SARS-CoV-2 S-protein obtained by molecular docking. interaction with three branches of COVID-19 S protein (Up) and distributed CQDs (down).

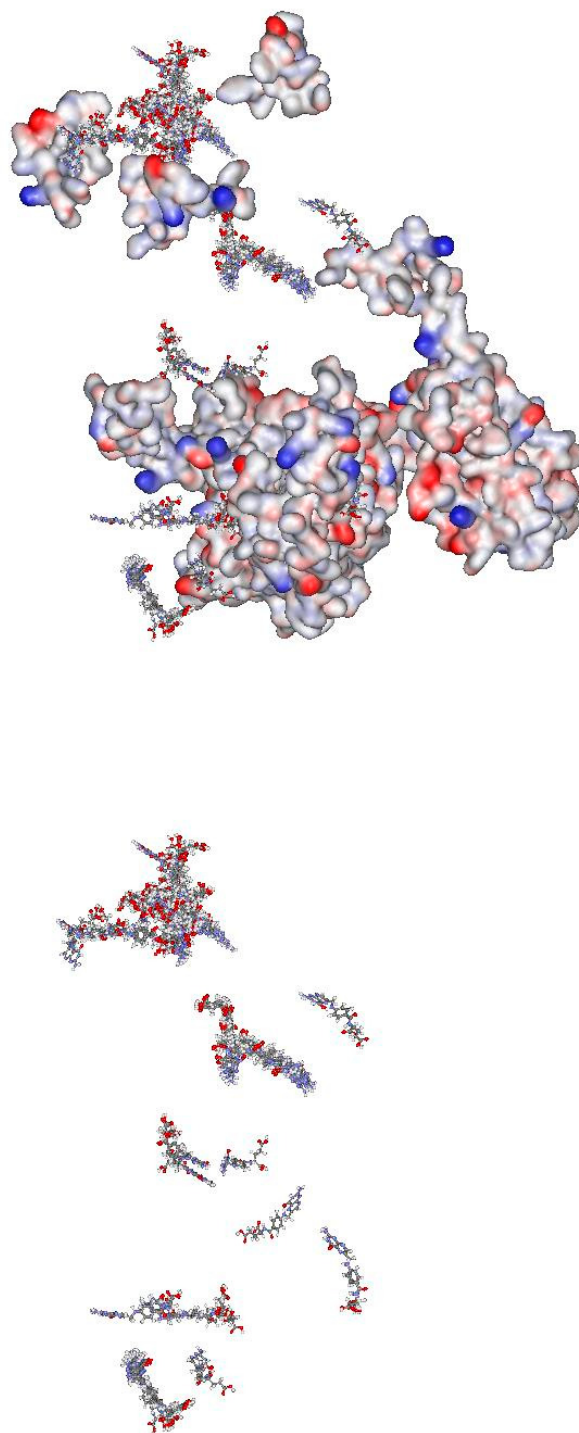

**Fig. S7** Interaction of SARS-CoV-2 S-protein with Folic Acid using molecular docking. interaction with three branches of COVID-19 S protein (Up) and distributed CQDs (down).

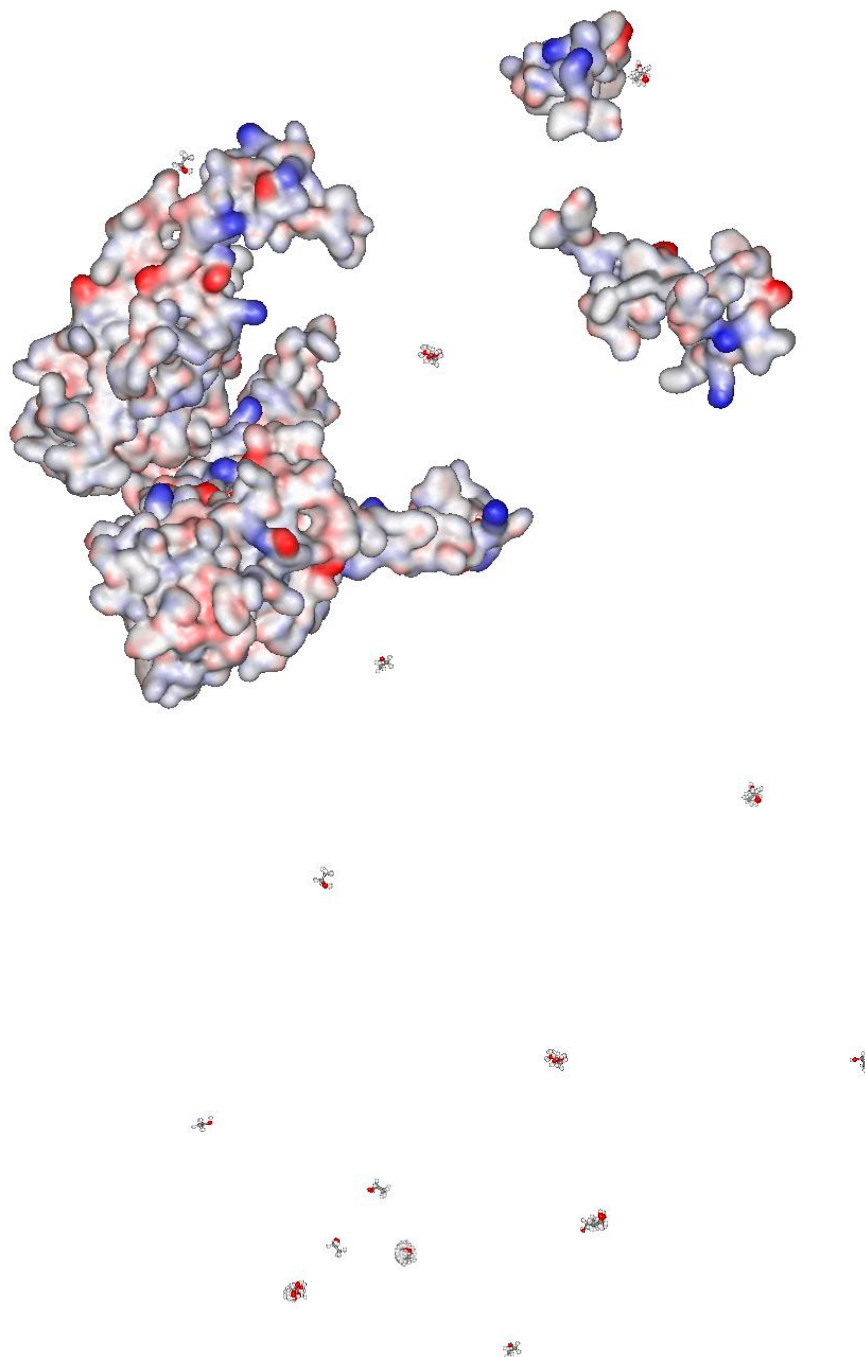

**Fig. S8** Distribution of EtOH in SARS-CoV-2 S-protein obtained by molecular docking. interaction with three branches of COVID-19 S protein (Up) and distributed CQDs (down)

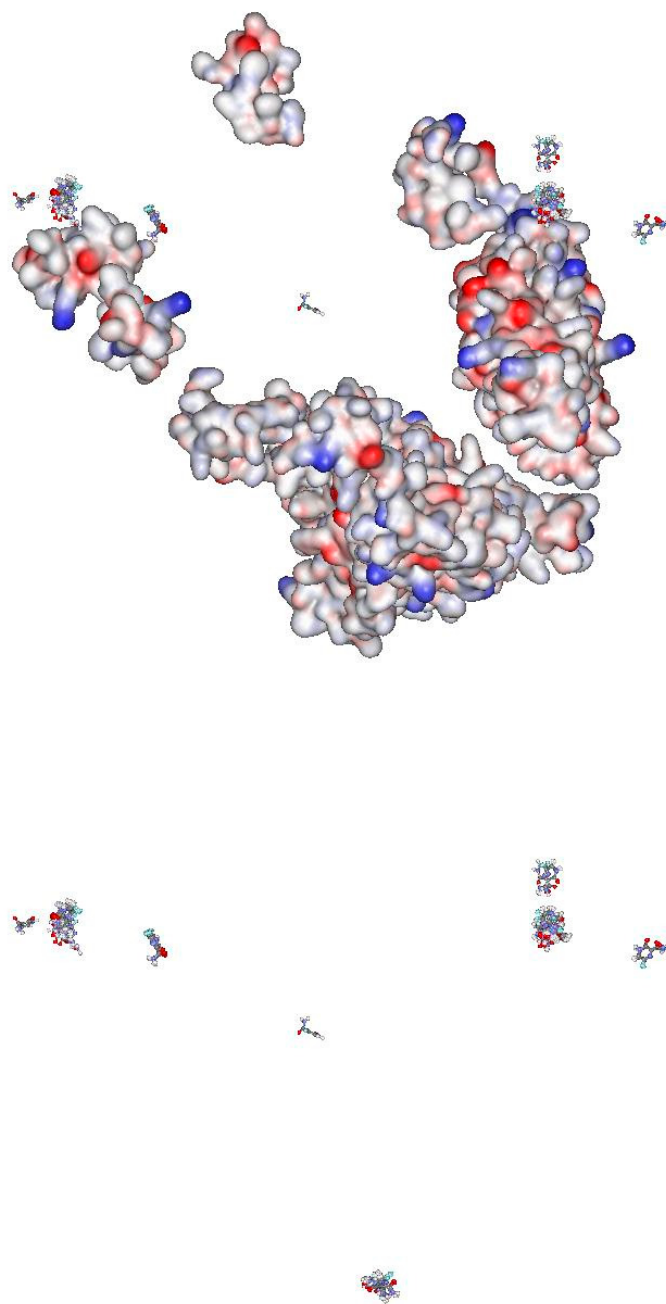

**Fig. S9** Distribution of Favipiravir in SARS-CoV-2 S-protein obtained by molecular docking. interaction with three branches of COVID-19 S protein (Up) and distributed CQDs (down).
